# Supplementary material for: Development of Two-Dimensional Model of Photosynthesis in Plant Leaves and Analysis of Induction of Spatial Heterogeneity of CO2 Assimilation Rate under Action of Excess Light and Drought
Source: MDPI journal article supplement (doi:10.3390/plants11233285), 2022-11-29
Supplement: s1 [file s1]

# Development of Two-Dimensional Model of Photosynthesis in Plant Leaves and Analysis of Induction of Spatial Heterogeneity in CO<sub>2</sub> Assimilation Rate under Action of Excess Light and Water Shortage

Ekaterina Sukhova, Daria Ratnitsyna, Ekaterina Gromova, Vladimir Sukhov \*

Department of Biophysics, N.I. Lobachevsky State University of Nizhny Novgorod, Nizhny Novgorod, 603950, Russia

\* Corresponding: vssuh@mail.ru

## *Supplementary Materials*

### Equations and Parameters of the Two-Dimensional Photosynthetic Model

#### 1. Description of photosynthetic CO<sub>2</sub> assimilation and photorespiration

The simplified photosynthetic model of Farquhar, von Caemmerer and Berry (FvCB-model) [1-2] which included only the Rubisco-limited CO<sub>2</sub> assimilation rate and electron transport-limited CO<sub>2</sub> assimilation rate was used in the work. The assimilation ( $A_{hv}$ ) was described by Equation (S1):

$$A_{hv} = \min(W_c, W_j) \frac{[CO_2]_{str} - \Gamma^*}{[CO_2]_{str}} \quad (S1),$$

where  $W_c$  (Equation (S2)) and  $W_j$  (Equation (S3)) were carboxylation rates at the Rubisco-limited CO<sub>2</sub> assimilation and electron transport-limited CO<sub>2</sub> assimilation conditions, respectively,  $[CO_2]_{str}$  was concentration of CO<sub>2</sub> in the stroma of chloroplasts,  $\Gamma^*$  was the photosynthetic CO<sub>2</sub> compensation point in the absence of mitochondrial respiration.

$$W_c = \frac{V_{max}[CO_2]_{str}}{[CO_2]_{str} + K_c \left(1 + \frac{[O_2]}{K_o}\right)} \quad (S2),$$

$$W_j = \frac{J}{4 + 8 \frac{\Gamma^*}{[CO_2]_{str}}} \quad (S3),$$

where  $V_{max}$  was the maximum rate of carboxylation of Rubisco,  $[O_2]$  was concentration of O<sub>2</sub> in the stroma of chloroplasts,  $K_c$  and  $K_o$  were the Michaelis constants for carboxylation and oxygenation, respectively,  $J$  was the potential of whole chain electron transport (Equation (S4)):

$$J = \frac{I + J_{max}}{2\theta} - \frac{\sqrt{(I + J_{max})^2 - 4\theta I J_{max}}}{2\theta} \quad (S4),$$

where  $I$  (Equation (S5)) was the useful light absorbed by the photosystem II,  $J_{max}$  was the maximum electron transport rate, and  $\theta$  was an empirical curvature factor [1].

$$I = \frac{\text{abs}(1 - f)}{2} \text{PAR} \quad (S5),$$

where PAR was the photosynthetic active radiation, abs was the light absorptance (abs), and f was the factor of correction for spectral quality of the light.

The photorespiration rate ( $V_{\text{phr}}$ ) was described by Equation (S6):

$$V_{\text{phr}} = \frac{A_{\text{hv}} \Gamma^*}{[\text{CO}_2]_{\text{str}}} \quad (\text{S6}),$$

In accordance with von Caemmerer et al. [1], it was assumed that rate of the dark respiration ( $R_d$ ) was constant.

## 2. Description of stomata and transmembrane $\text{CO}_2$ fluxes

Equations (S7), (S8), and (S9) based on the Fick's law [3] were used for description of  $\text{CO}_2$  transport through the stomata ( $j_s$ ), plasma membrane ( $j_{\text{PM}}$ ), and chloroplast envelopes ( $j_{\text{chl}}$ ), respectively:

$$j_s = g_s^0 ([\text{CO}_2]_{\text{out}} - [\text{CO}_2]_{\text{ap}}) \quad (\text{S7}),$$

$$j_{\text{PM}} = g_{\text{PM}} ([\text{CO}_2]_{\text{ap}} - [\text{CO}_2]_{\text{cyt}}) \quad (\text{S8}),$$

$$j_{\text{chl}} = g_{\text{chl}} ([\text{CO}_2]_{\text{cyt}} - [\text{CO}_2]_{\text{str}}) \quad (\text{S9}),$$

where  $[\text{CO}_2]_{\text{out}}$ ,  $[\text{CO}_2]_{\text{ap}}$ , and  $[\text{CO}_2]_{\text{cyt}}$  were concentrations of  $\text{CO}_2$  in the air, apoplast and cytoplasm, respectively,  $g_s^0$ ,  $g_{\text{PM}}$ , and  $g_{\text{chl}}$  were  $\text{CO}_2$  conductance for the stomata, plasma membrane, and chloroplast envelopes, respectively.

It was assumed that  $g_s$  was constant in model elements with both mesophyll cell and stomata or zero in model elements without stomata. It was also assumed that the  $\text{CO}_2$  conductance per area unit was equal for the plasma membrane and chloroplast envelopes [4-5]; thus,  $g_{\text{PM}}$  and  $g_{\text{chl}}$  were derived from the  $\text{CO}_2$  conductance through mesophyll ( $g_m$ ):

$$g_{\text{chl}} = \frac{g_m \left(1 + \frac{S_{\text{PM}}}{S_{\text{chl}}}\right)}{\frac{S_{\text{PM}}}{S_{\text{chl}}}} \quad (\text{S10}),$$

$$g_{\text{pm}} = g_m \left(1 + \frac{S_{\text{PM}}}{S_{\text{chl}}}\right) \quad (\text{S11}),$$

where  $\frac{S_{\text{PM}}}{S_{\text{chl}}}$  was ratio of the total area of the plasma membranes to the total area of the envelopes of chloroplasts.

## 3. Description of lateral fluxes of $\text{CO}_2$ and $\text{HCO}_3^-$

Equations (S12) and (S13) based on our previous work [6] were used for description of  $\text{CO}_2$  ( $j_{\text{CO}_2}^{n,k/l,m}$ ) and  $\text{HCO}_3^-$  ( $j_{\text{HCO}_3^-}^{n,k/l,m}$ ) volume fluxes, respectively, between apoplasts of two neighboring cells (their parameters were marked by indices n, k and l, m):

$$j_{\text{CO}_2}^{n,k/l,m} = \frac{D_{\text{CO}_2}}{a^2 \left(1 + \frac{V_{\text{ap}}}{V_{\text{cell}}}\right)^{1/3}} ([\text{CO}_2]_{\text{ap}}^{l,m} - [\text{CO}_2]_{\text{ap}}^{n,k}) \quad (\text{S12}),$$

$$j_{\text{HCO}_3^-}^{n,k/l,m} = \frac{D_{\text{HCO}_3^-}}{a^2 \left(1 + \frac{V_{\text{ap}}}{V_{\text{cell}}}\right)^{1/3}} ([\text{HCO}_3^-]_{\text{ap}}^{l,m} - [\text{HCO}_3^-]_{\text{ap}}^{n,k}) \quad (\text{S13}),$$

where  $[\text{HCO}_3^-]_{\text{ap}}$  was concentration of  $\text{HCO}_3^-$  in the apoplast,  $D_{\text{CO}_2}$  and  $D_{\text{HCO}_3^-}$  were coefficients of diffusion of  $\text{CO}_2$  and  $\text{HCO}_3^-$  in water, and a was linear size of cell in the model (it was assumed that these cells were

cubes),  $\frac{V_{ap}}{V_{cell}}$  was ratio of the apoplastic volume to the total cell volume. In border elements,  $\text{CO}_2$  and  $\text{HCO}_3^-$  fluxes directed outside of the simulated leaf were assumed equaling to zero.

#### 4. Description of changes in $\text{CO}_2$ and $\text{HCO}_3^-$ concentrations

Equations (S14), (S15), and (S16) were used for calculation of summary changes in  $\text{CO}_2$  and  $\text{HCO}_3^-$  concentrations in the apoplast ( $C_{ap}$ ), cytoplasm ( $C_{cyt}$ ), and chloroplast stroma ( $C_{str}$ ), respectively:

$$\frac{dC_{ap}^{n,k}}{dt} = 18 \cdot 10^{-5} \frac{S_{leaf}}{V_{ap}} (j_s^{n,k} - j_{PM}^{n,k}) + j_{CO_2}^{n,k/n-1,k} + j_{CO_2}^{n,k/n+1,k} + j_{CO_2}^{n,k/n,k-1} + j_{CO_2}^{n,k/n,k+1} + j_{HCO_3^-}^{n,k/n-1,k} + j_{HCO_3^-}^{n,k/n+1,k} + j_{HCO_3^-}^{n,k/n,k-1} + j_{HCO_3^-}^{n,k/n,k+1} \quad (S14),$$

$$\frac{dC_{cyt}^{n,k}}{dt} = 18 \cdot 10^{-5} \frac{S_{leaf}}{V_{cyt}} (j_{PM}^{n,k} - j_{chl}^{n,k} + R_d + V_{phr} \quad (S15),$$

$$\frac{dC_{str}^{n,k}}{dt} = 18 \cdot 10^{-5} \frac{S_{leaf}}{V_{str}} (j_{chl}^{n,k} - \min(W_c, W_j)) \quad (S16),$$

where  $\frac{S_{leaf}}{V_{ap}}$ ,  $\frac{S_{leaf}}{V_{cyt}}$ , and  $\frac{S_{leaf}}{V_{str}}$  were ratios of leaf areas to volumes of the apoplast, cytoplasm, and stroma, respectively,  $18 \cdot 10^{-5} \text{ dm}^3 \text{ mol}^{-1}$  was volume of 1 mol of  $\text{H}_2\text{O}$ .

In accordance with our previous work [7], we used portion of  $\text{CO}_2$  in the summary concentration of  $\text{CO}_2$  and  $\text{HCO}_3^-$  ( $P_{CO_2}$ ) for calculation of separate concentrations of  $\text{CO}_2$  and  $\text{HCO}_3^-$ .  $P_{CO_2}$  was calculated on basis of Equation (S17):

$$P_{CO_2} = \frac{1}{1 + 10^{pH-pK}} \quad (S17),$$

where  $pK$  was the negative logarithm of the equilibrium constant in the reaction of transition between  $\text{CO}_2$  and  $\text{HCO}_3^-$ .  $\text{CO}_2$  concentrations were calculated as multiplication of  $P_{CO_2}$  and the summary concentration of  $\text{CO}_2$  and  $\text{HCO}_3^-$ ;  $\text{HCO}_3^-$  concentrations were calculated as multiplication of  $(1-P_{CO_2})$  and the summary concentration of  $\text{CO}_2$  and  $\text{HCO}_3^-$ .

#### 5. Description of transmembrane $\text{H}^+$ and $\text{K}^+$ fluxes and membrane potential

Description of transmembrane  $\text{H}^+$  and  $\text{K}^+$  fluxes was based on our previous model [8-9]; however, this model was simplified. Only,  $\text{H}^+$ -ATPase, inwardly and outwardly rectifying  $\text{K}^+$  channels, and  $\text{K}^+/\text{H}^+$ -antiporter were described.

Proton flux through  $\text{H}^+$ -ATPase ( $j_P$ ) was described by Equation (S18) (in accordance with the “two-state model” [8, 10]):

$$j_P = A_{ATP} A_{BL} \frac{k_{+1}k_{+2} - k_{-1}k_{-2}}{k_{+1} + k_{+2} + k_{-1} + k_{-2}} \quad (S18),$$

where  $k_{+1} = k_1[\text{H}^+]_{ap}$ ,  $k_{-1} = k_1 \exp\left(\frac{G_{ATP}}{RT}\right)$ ,  $k_{+2} = \frac{k_2 u}{1 - \exp(-u)}$ , and  $k_{-2} = \frac{k_2 u [\text{H}^+]_{cyt} \exp(-u)}{1 - \exp(-u)}$  were velocity constants for transitions between states of the  $\text{H}^+$ -ATPase,  $A_{ATP}$  (Equation (S19)) and  $A_{BL}$  (Equation (S20)) were coefficients describing activation of  $\text{H}^+$ -ATPase by the cytoplasmic ATP concentration ( $[\text{ATP}]$ ) and intensity of blue light (BL), respectively,  $u = \frac{E_m F}{RT}$  was the normalized membrane potential,  $[\text{H}^+]_{ap}$  and  $[\text{H}^+]_{cyt}$  were proton concentrations in the apoplast and cytoplasm, respectively,  $G_{ATP}$  was the energy of ATP hydrolysis,  $k_1$  and  $k_2$  were velocity constants of transitions between states of the  $\text{H}^+$ -ATPase at  $u=0$  and  $[\text{H}^+]_{ap} = [\text{H}^+]_{out} = 1 \text{ M}$ ,  $E_m$  was membrane potential across the plasma membrane,  $F$ ,  $R$ , and  $T$  were standard thermodynamic values.

$$A_{ATP} = \frac{K_{cyt}[ATP]}{K_{ATP} + K_{cyt}[ATP]} \quad (S19),$$

$$A_{BL} = \frac{BL}{BL + K_{BL}} + A_{BL0} \frac{K_{BL}}{K_{BL} + BL} \quad (S20),$$

where  $K_{ATP}$  was the constant of the 50% activation of  $H^+$ -ATPase by  $[ATP]$ ,  $K_{cyt}$  was the proportional coefficient between concentrations of  $ATP$  in the leaf and cytoplasm,  $A_{BL0}$  was activity of  $H^+$ -ATPase without the blue light,  $K_{BL}$  was the constant of the 50% activation of  $H^+$ -ATPase by  $BL$ .

$K^+$  fluxes through inwardly ( $J_{IRKC}$ ) and outwardly ( $J_{ORKC}$ ) rectifying  $K^+$  channels were described on basis of the Goldman–Hodgkin–Katz equation [8-9, 11]:

$$J_{IRKC} = \frac{P_{IRKC} P_{max}^{IRKC} u ([K^+]_{cyt} - [K^+]_{ap} \exp(-u))}{1 - \exp(-u)} \quad (S21),$$

$$J_{ORKC} = \frac{P_{ORKC} P_{max}^{ORKC} u ([K^+]_{cyt} - [K^+]_{ap} \exp(-u))}{1 - \exp(-u)} \quad (S22),$$

where  $P_{IRKC}$  (Equation (S23)) and  $P_{ORKC}$  (Equation (S24)) were probabilities of open states of inwardly and outwardly rectifying  $K^+$  channels, respectively, where  $P_{max}^{IRKC}$  and  $P_{max}^{ORKC}$  were maximum permeabilities of inwardly and outwardly rectifying  $K^+$  channels, respectively,  $[K^+]_{cyt}$  and  $[K^+]_{ap}$  were concentrations of  $K^+$  in the cytoplasm and apoplast.

$$P_{IRKC} = \frac{1}{1 + \exp(c_{IRKC}(u - u_{IRKC}))} \quad (S23),$$

$$P_{ORKC} = \frac{1}{1 + \exp(c_{ORKC}(u_{ORKC} - u))} \quad (S24),$$

where  $c_{IRKC}$  and  $c_{ORKC}$  were constants which represented a portion of the membrane potential acting on the gating mechanisms and their charge in inwardly and outwardly rectifying  $K^+$  channels, respectively,  $u_{IRKC}$  and  $u_{ORKC}$  were the normalized potential barriers for the transition of the channel from the closed state to the open one in inwardly and outwardly rectifying  $K^+$  channels, respectively.

$H^+$  and  $K^+$  fluxes through  $K^+/H^+$ -antiporter ( $J_{Ant}$ ) were described in accordance with our previous works [8-9]:

$$J_{Ant} = k_{Ant} ([K^+]_{cyt} [H^+]_{ap} - [K^+]_{ap} [H^+]_{cyt}) \quad (S25),$$

where  $k_{Ant}$  was parameter which was proportional to rate of transports of ions through the antiporter.

$E_m$  was described as stationary value in accordance with our previous works [6, 9]:

$$E_m = \frac{g_K E_K + g_P E_P}{g_K + g_P} \quad (S26),$$

where  $E_K$  and  $E_P$  were reverse potentials for  $K^+$  channels (Equation (S27)) and  $H^+$ -ATPase (Equation (S28)), respectively,  $g_K$  and  $g_P$  were electrical conductance for  $K^+$  channels (Equation (S29)) and  $H^+$ -ATPase (Equation (S30)), respectively:

$$E_K = \frac{RT}{F} \ln \left( \frac{[K^+]_{ap}}{[K^+]_{cyt}} \right) \quad (S27),$$

$$E_P = \frac{RT}{F} \ln \left( \frac{[H^+]_{ap}}{[H^+]_{cyt}} \right) + \frac{G_{ATP}}{F} \quad (S28),$$

$$g_K = \frac{F(J_{kg} + J_{kd})}{E_m - E_K} \quad (S29),$$

$$g_P = \frac{FJ_P}{E_m - E_P} \quad (S30),$$

## 6. Description of lateral H<sup>+</sup> and K<sup>+</sup> fluxes

Equations (S31) and (S32) based on our previous work [6] were used for description of K<sup>+</sup> ( $j_{K^{n,k/l,m}}$ ) and H<sup>+</sup> ( $j_{H^{n,k/l,m}}$ ) volume fluxes, respectively, between apoplasts of two neighboring cells (their parameters were marked by indices n, k and l, m):

$$j_{K^{n,k/l,m}} = \frac{D_K}{a^2(1 + \frac{V_{ap}}{V_{cell}})^{1/3}} ([K^+]_{ap}^{l,m} - [K^+]_{ap}^{n,k}) \quad (S31),$$

$$j_{H^{n,k/l,m}} = \frac{D_H}{a^2(1 + \frac{V_{ap}}{V_{cell}})^{1/3}} ([H^+]_{ap}^{l,m} - [H^+]_{ap}^{n,k}) \quad (S32),$$

where  $D_K$  and  $D_H$  were coefficients of diffusion of K<sup>+</sup> and H<sup>+</sup> in water. In border elements, ion fluxes directed outside of the simulated leaf were assumed equaling to zero.

## 7. Description of changes in K<sup>+</sup> and H<sup>+</sup> concentrations

Equations (S33), (S34), (S35), and (S36) were used for calculation of summary changes in total K concentrations in the apoplast ( $[K]_{ap}$ ) and concentration of K<sup>+</sup> in the cytoplasm ( $[K^+]_{cyt}$ ) and changes in total H concentrations in the apoplast ( $[H]_{ap}$ ) and cytoplasm ( $[H]_{cyt}$ ), respectively.

$$\frac{d[K]_{ap}^{n,k}}{dt} = \frac{1}{a} \left( \frac{V_{ap}}{V_{cell}} \right)^{-1} (j_{IRKC}^{n,k} + j_{ORKC}^{n,k} + j_{Ant}^{n,k}) + j_{K^{n,k/n-1,k}} + j_{K^{n,k/n+1,k}} + j_{K^{n,k/n,k-1}} + j_{K^{n,k/n,k+1}} \quad (S33),$$

$$\frac{d[K^+]_{cyt}^{n,k}}{dt} = -\frac{1}{a} \left( \frac{V_{cyt}}{V_{cell}} \right)^{-1} (j_{IRKC}^{n,k} + j_{ORKC}^{n,k} + j_{Ant}^{n,k}) \quad (S34),$$

$$\frac{d[H]_{ap}^{n,k}}{dt} = \frac{1}{a} \left( \frac{V_{ap}}{V_{cell}} \right)^{-1} (j_P^{n,k} - j_{Ant}^{n,k}) + j_{H^{n,k/n-1,k}} + j_{H^{n,k/n+1,k}} + j_{H^{n,k/n,k-1}} + j_{H^{n,k/n,k+1}} \quad (S35),$$

$$\frac{d[H]_{cyt}^{n,k}}{dt} = -\frac{1}{a} \left( \frac{V_{cyt}}{V_{cell}} \right)^{-1} (j_P^{n,k} - j_{Ant}^{n,k}) \quad (S36),$$

where  $\frac{V_{cyt}}{V_{cell}}$  was ratio of the cytoplasmic volume to the total cell volume.

The model included description of buffer capacity of the apoplast for K<sup>+</sup> and H<sup>+</sup> and buffer capacity of the cytoplasm for H<sup>+</sup> [8-9]. Equation (S37) described buffer capacity of the cytoplasm:

$$[H^+]_{cyt} = \frac{([H]_{cyt} - B_{cyt} - K_H^{cyt})}{2} + \frac{\sqrt{([H]_{cyt} - B_{cyt} - K_H^{cyt})^2 + 4K_H^{cyt}[H]_{cyt}}}{2} \quad (S37),$$

where  $B_{cyt}$  was total concentration of proton buffer (free and bonded) in the cytoplasm,  $K_H^{cyt}$  was the dissociation constant between the cytoplasmic buffer and H<sup>+</sup>.

Equations (S38) and (S39) described buffer capacity of the apoplast [9]:

$$[H^+]_{ap} = \frac{-K_H^{ap}[H]_{ap}(B_{ap}-[H]_{ap}-[K]_{ap}-K_K^{ap})}{2(K_K^{ap})(B_{ap}-[H]_{ap})} + \sqrt{\frac{(K_H^{ap}[H]_{ap}(B_{ap}-[H]_{ap}-[K]_{ap}-K_K^{ap}))^2 + 4K_K^{ap}(K_H^{ap})^2([H]_{ap})^2(B_{ap}-[H]_{ap})}{2K_K^{ap}(B_{ap}-[H]_{ap})}} \quad (S38),$$

$$[K^+]_{ap} = \frac{K_K^{ap}[H^+]_{ap}[K]_{ap}}{K_H^{ap}[H]_{ap} + K_K^{ap}[H^+]_{ap}} \quad (S39),$$

where  $B_{ap}$  was total concentration of proton buffer (free and bonded) in the apoplast,  $K_H^{ap}$  and  $K_K^{ap}$  were the dissociation constants between the apoplastic buffer and  $H^+$  and between the apoplastic buffer and  $K^+$ . Concentration of  $H^+$  in stroma ( $[H^+]_{str}$ ) was assumed as constant.

## 8. Description of changes in ATP concentration

Stationary concentration of ATP ( $[ATP]$ ), which was calculated per unit of the leaf volume, was described by Equation (40):

$$[ATP] = \frac{\beta(R_d + \alpha \cdot \min(W_c, W_j))}{\beta(R_d + \alpha \cdot \min(W_c, W_j)) + k_{cons}} ATP_{\Sigma} \quad (S40),$$

where  $\beta = \frac{S_{leaf}}{V_{leaf}} \frac{5}{ATP_{\Sigma} - [ATP]_{dark}}$  was additional parameter,  $\frac{S_{leaf}}{V_{leaf}}$  was ratio of the leaf area to the leaf volume,  $ATP_{\Sigma}$  and  $[ATP]_{dark}$  were total concentration of ATP and ADP and concentration of ATP under dark conditions (without photosynthetic processes),  $\alpha$  was portion of the  $CO_2$  assimilation rate which was used for the ATP synthesis, and  $k_{cons}$  was effective velocity constant of all processes of the ATP consumption (this parameter was calculated on basis of only  $R_d$  under dark conditions).

## 9. Parameterization of the model

Table S1 shows main parameters of the model which were used in the work. Initial values of concentrations of  $H^+$  and  $K^+$  (and their total concentrations) in the apoplast and cytoplasm and concentrations of  $CO_2$  in the apoplast, cytoplasm, and stroma of chloroplasts, which were variables of our model, are also shown in this table. It should be noted that initial concentrations of  $HCO_3^-$  and initial summary concentrations of  $CO_2$  and  $HCO_3^-$  were calculated on basis of initial concentrations of  $CO_2$  and equation (S17).

**Table S1.** Parameters used in the two-dimensional photosynthetic model

| <i>Parameters</i>                                                         | <i>Values</i> | <i>Units</i>                         | <i>Sources for calculation of values</i> |
|---------------------------------------------------------------------------|---------------|--------------------------------------|------------------------------------------|
| <i>Photosynthetic <math>CO_2</math> assimilation and photorespiration</i> |               |                                      |                                          |
| <b>K<sub>c</sub></b>                                                      | 260           | ppm                                  | [1]                                      |
| <b>K<sub>o</sub></b>                                                      | 179000        | ppm                                  | [1]                                      |
| <b>V<sub>max</sub></b>                                                    | 80            | $\mu\text{mol m}^{-2} \text{s}^{-1}$ | [1]                                      |
| <b>I<sup>*</sup></b>                                                      | 38.6          | ppm                                  | [1]                                      |
| <b>[O<sub>2</sub>]</b>                                                    | 200000        | ppm                                  | [1]                                      |
| <b>J<sub>max</sub></b>                                                    | 160           | $\mu\text{mol m}^{-2} \text{s}^{-1}$ | [1]                                      |
| <b>abs</b>                                                                | 0.85          |                                      | [1]                                      |
| <b>f</b>                                                                  | 0.15          |                                      | [1]                                      |
| <b>θ</b>                                                                  | 0.7           |                                      | [1]                                      |
| <b>R<sub>d</sub></b>                                                      | 1             | $\mu\text{mol m}^{-2} \text{s}^{-1}$ | [1]                                      |

| <i>Stomata and transmembrane CO<sub>2</sub> fluxes</i>                                            |                                          |                          |                                                                                                                                                                                      |
|---------------------------------------------------------------------------------------------------|------------------------------------------|--------------------------|--------------------------------------------------------------------------------------------------------------------------------------------------------------------------------------|
| $[CO_2]_{out}$                                                                                    | 360                                      | ppm                      | Assumed                                                                                                                                                                              |
| $g_s^0$ (model elements with both mesophyll cell and stomata)                                     | 0.576 (basic)<br>or<br>0.207 (decreased) | $mol\ m^{-2}\ s^{-1}$    | The basic $g_s^0$ was calculated as $g_s \cdot 9$ , where $g_s = 0.064\ mol\ m^{-2}\ s^{-1}$ (the current experiment).<br>The decreased $g_s^0$ was calculated as $0.576 \cdot 9/25$ |
| $g_s^0$ (model elements without stomata)                                                          | 0                                        | $mol\ m^{-2}\ s^{-1}$    | Assumed                                                                                                                                                                              |
| $g_m$                                                                                             | 0.1                                      | $mol\ m^{-2}\ s^{-1}$    | [12]                                                                                                                                                                                 |
| $\frac{S_{PM}}{S_{chl}}$                                                                          | 0.495                                    |                          | [4-5]                                                                                                                                                                                |
| <i>Lateral CO<sub>2</sub> and HCO<sub>3</sub><sup>-</sup> fluxes</i>                              |                                          |                          |                                                                                                                                                                                      |
| <b>a</b>                                                                                          | $10^{-3}$                                | dm                       | [6]                                                                                                                                                                                  |
| $D_{CO_2}$                                                                                        | $1.83 \cdot 10^{-7}$                     | $dm^2\ s^{-1}$           | [5]                                                                                                                                                                                  |
| $D_{HCO_3}$                                                                                       | $0.95 \cdot 10^{-7}$                     | $dm^2\ s^{-1}$           | [5]                                                                                                                                                                                  |
| $\frac{V_{ap}}{V_{cell}}$                                                                         | 0.1                                      |                          | [11]                                                                                                                                                                                 |
| <i>Changes in CO<sub>2</sub> and HCO<sub>3</sub><sup>-</sup> concentrations</i>                   |                                          |                          |                                                                                                                                                                                      |
| $\frac{S_{leaf}}{V_{ap}}$                                                                         | 5500                                     | $dm^{-1}$                | [11, 13]                                                                                                                                                                             |
| $\frac{S_{leaf}}{V_{cyt}}$                                                                        | 13750                                    | $dm^{-1}$                | [3, 11, 13]                                                                                                                                                                          |
| $\frac{S_{leaf}}{V_{str}}$                                                                        | 6790                                     | $dm^{-1}$                | [3, 11, 13]                                                                                                                                                                          |
| <b>pK</b>                                                                                         | 6.35                                     |                          | [7]                                                                                                                                                                                  |
| <i>Description of transmembrane H<sup>+</sup> and K<sup>+</sup> fluxes and membrane potential</i> |                                          |                          |                                                                                                                                                                                      |
| <i>H<sup>+</sup>-ATPase</i>                                                                       |                                          |                          |                                                                                                                                                                                      |
| <b>k<sub>1</sub></b>                                                                              | 0.045                                    | $s^{-1}$                 | [9]                                                                                                                                                                                  |
| <b>k<sub>2</sub></b>                                                                              | $2.58 \cdot 10^{-5}$                     | $s^{-1}$                 | [9]                                                                                                                                                                                  |
| <b>T</b>                                                                                          | 296                                      | K                        | [8]                                                                                                                                                                                  |
| <b>F</b>                                                                                          | 96500                                    | $C\ mol^{-1}$            | [8]                                                                                                                                                                                  |
| <b>R</b>                                                                                          | 8.31                                     | $J\ mol^{-1}\ K^{-1}$    | [8]                                                                                                                                                                                  |
| <b>G<sub>ATP</sub></b>                                                                            | -50000                                   | J                        | [8]                                                                                                                                                                                  |
| <b>K<sub>ATP</sub></b>                                                                            | $186 \cdot 10^{-6}$                      | M                        | [14]                                                                                                                                                                                 |
| <b>K<sub>cyt</sub></b>                                                                            | 5.676                                    |                          | [3]                                                                                                                                                                                  |
| <b>A<sub>BL0</sub></b>                                                                            | 0.566                                    |                          | [14]                                                                                                                                                                                 |
| <b>K<sub>BL</sub></b>                                                                             | 6.55                                     | $\mu mol\ m^{-2} s^{-1}$ | [14]                                                                                                                                                                                 |
| <i>Inwardly and outwardly rectifying K<sup>+</sup> channels</i>                                   |                                          |                          |                                                                                                                                                                                      |
| <b>P<sub>max</sub><sup>IRKC</sup></b>                                                             | $2.9 \cdot 10^{-7}$                      | $dm\ s^{-1}$             | [9]                                                                                                                                                                                  |
| <b>P<sub>max</sub><sup>ORKC</sup></b>                                                             | $2.9 \cdot 10^{-7}$                      | $dm\ s^{-1}$             | [9]                                                                                                                                                                                  |
| <b>u<sup>IRKC</sup></b>                                                                           | -7.4                                     |                          | [8]                                                                                                                                                                                  |
| <b>u<sup>ORKC</sup></b>                                                                           | -2.53                                    |                          | [8]                                                                                                                                                                                  |
| <b>c<sup>IRKC</sup></b>                                                                           | 1.1                                      |                          | [8]                                                                                                                                                                                  |
| <b>c<sup>ORKC</sup></b>                                                                           | 1.13                                     |                          | [8]                                                                                                                                                                                  |

| <i>K<sup>+</sup>/H<sup>+</sup>-antiporter</i> |       |                                 |     |
|-----------------------------------------------|-------|---------------------------------|-----|
| <b>k<sub>ant</sub></b>                        | 0.015 | M <sup>-1</sup> s <sup>-1</sup> | [8] |

*Description of lateral H<sup>+</sup> and K<sup>+</sup> fluxes*

|                      |                         |                                 |     |
|----------------------|-------------------------|---------------------------------|-----|
| <b>D<sub>H</sub></b> | 7.8 · 10 <sup>-7</sup>  | dm <sup>2</sup> s <sup>-1</sup> | [6] |
| <b>D<sub>K</sub></b> | 1.96 · 10 <sup>-7</sup> | dm <sup>2</sup> s <sup>-1</sup> | [6] |

*Description of changes in K<sup>+</sup> and H<sup>+</sup> concentrations*

|                                          |                         |   |      |
|------------------------------------------|-------------------------|---|------|
| $\frac{V_{\text{cyt}}}{V_{\text{cell}}}$ | 0.04                    |   | [3]  |
| <b>B<sub>cyt</sub></b>                   | 0.2                     | M | [8]  |
| <b>K<sub>H<sup>+</sup>cyt</sub></b>      | 10 <sup>-6</sup>        | M | [8]  |
| <b>B<sub>ap</sub></b>                    | 0.083                   | M | [8]  |
| <b>K<sub>H<sup>+</sup>ap</sub></b>       | 10 <sup>-6</sup>        | M | [8]  |
| <b>K<sub>K<sup>+</sup>ap</sub></b>       | 10 <sup>-4</sup>        | M | [8]  |
| <b>[H<sup>+</sup>]<sub>str</sub></b>     | 3.16 · 10 <sup>-8</sup> | M | [15] |

*Description of changes in ATP concentration*

|                                           |                          |                                |         |
|-------------------------------------------|--------------------------|--------------------------------|---------|
| <b>α</b>                                  | 0.2                      |                                | Assumed |
| <b>ATP<sub>Σ</sub></b>                    | 0.132 · 10 <sup>-3</sup> | M                              | [16]    |
| <b>[ATP]<sub>dark</sub></b>               | 0.065 · 10 <sup>-3</sup> | M                              | [16]    |
| <b>k<sub>cons</sub></b>                   | 0.3846                   | s <sup>-1</sup>                | Assumed |
| $\frac{S_{\text{leaf}}}{V_{\text{leaf}}}$ | 5000                     | m <sup>2</sup> m <sup>-3</sup> | [13]    |

*Initial values of main variables*

|                                                          |                                                 |     |         |
|----------------------------------------------------------|-------------------------------------------------|-----|---------|
| <b>[CO<sub>2</sub>]<sub>ap</sub></b>                     | 360                                             | ppm | Assumed |
| <b>[CO<sub>2</sub>]<sub>cyt</sub></b>                    | 360                                             | ppm | Assumed |
| <b>[CO<sub>2</sub>]<sub>str</sub></b>                    | 360                                             | ppm | Assumed |
| <b>[K]<sub>ap</sub> / [K<sup>+</sup>]<sub>ap</sub></b>   | 8.2 · 10 <sup>-2</sup> / 3.5 · 10 <sup>-3</sup> | M   | [8]     |
| <b>[K<sup>+</sup>]<sub>cyt</sub></b>                     | 1.4 · 10 <sup>-1</sup>                          | M   | [17]    |
| <b>[H]<sub>ap</sub> / [H<sup>+</sup>]<sub>ap</sub></b>   | 2 · 10 <sup>-3</sup> / 10 <sup>-6</sup>         | M   | [8]     |
| <b>[H]<sub>cyt</sub> / [H<sup>+</sup>]<sub>cyt</sub></b> | 1.5 · 10 <sup>-2</sup> / 7 · 10 <sup>-8</sup>   | M   | [8]     |

## References for Supplementary Materials

1. von Caemmerer, S.; Farquhar, G.; Berry, J. Biochemical model of C<sub>3</sub> photosynthesis, In *Photosynthesis in silico. Advances in Photosynthesis and Respiration*. Laisk, A., Nedbal, L., Govindjee, Eds. Springer, Dordrecht, Germany, 2009; Volume 29, pp. 209-230.
2. Bernacchi, C.J.; Rosenthal, D.M.; Pimentel, C.; Long, S.P.; Farquhar, G.D. Modeling the temperature dependence of C<sub>3</sub>. In *Photosynthesis in silico. Advances in Photosynthesis and Respiration*. Laisk, A., Nedbal, L., Govindjee Eds. Springer, Dordrecht, Germany, 2009; Volume 29, pp. 231-246.
3. Winter, H.; Robinson, D.G.; Heldt, H.W. Subcellular volumes and metabolite concentrations in spinach leaves. *Planta*. **1994**, 193, 530-535.
4. Evans, J.R.; Kaldenhoff, R.; Genty, B.; Terashima, I. Resistances along the CO<sub>2</sub> diffusion pathway inside leaves. *J. Exp. Bot.* **2009**, 60, 2235–2248.
5. Tholen, D.; Zhu, X.-G. The mechanistic basis of internal conductance: a theoretical analysis of mesophyll cell photosynthesis and CO<sub>2</sub> diffusion. *Plant Physiol.* **2011**, 156, 90-105.
6. Sukhov, V.; Nerush, V.; Orlova, L.; Vodenev, V. Simulation of action potential propagation in plants. *J. Theor. Biol.* **2011**, 291, 47-55.



7. Sukhova, E.M.; Sukhov, V.S. Dependence of the CO<sub>2</sub> uptake in a plant cell on the plasma membrane H<sup>+</sup>-ATPase activity: theoretical analysis. *Biochem. Moscow Suppl. Ser. A*. **2018**, *12*, 146-159.
8. Sukhov, V.; Vodeneev, V. A mathematical model of action potential in cells of vascular plants. *J. Membr. Biol.* **2009**, *232*, 59-67.
9. Sukhova, E.; Ratnitsyna, D.; Sukhov, V. Stochastic spatial heterogeneity in activities of H<sup>+</sup>-ATP-ases in electrically connected plant cells decreases threshold for cooling-induced electrical responses. *Int. J. Mol. Sci.* **2021**, *22*, 8254.
10. Sukhova, E.; Akinchits, E.; Sukhov, V. Mathematical models of electrical activity in plants. *J. Membr. Biol.* **2017**, *250*, 407-423.
11. Gradmann, D. Impact of apoplast volume on ionic relations in plant cells. *J. Membr. Biol.* **2001**, *184*, 61-69.
12. Flexas, J.; Barbour, M.M.; Brendel, O.; Cabrera, H.M.; Carriqui, M.; Díaz-Espejo, A.; Douthe, C.; Dreyer, E.; Ferrio, J.P.; Gago, J.; Gallé, A.; Galmés, J.; Kodama, N.; Medrano, H.; Niinemets, Ü.; Peguero-Pina, J.J.; Pou, A.; Ribas-Carbó, M.; Tomás, M.; Tosens, T.; Warren, C.R. Mesophyll diffusion conductance to CO<sub>2</sub>: an unappreciated central player in photosynthesis. *Plant Sci.* **2012**, *193-194*, 70-84.
13. Day, T.A.; Vogelmann, T.C. Alterations in photosynthesis and pigment distributions in pea leaves following UV-B exposure. *Physiol. Plant.* **1995**, *94*, 433-440.
14. Kinoshita, T.; Shimazaki, K. Blue light activates the plasma membrane H<sup>+</sup>-ATPase by phosphorylation of the C-terminus in stomatal guard cells. *EMBO J.* **1999**, *18*, 5548-5558.
15. Antal, T.K.; Kovalenko, I.B.; Rubin, A.B.; Tyystjärvi, E. Photosynthesis-related quantities for education and modeling. *Photosynth Res.* **2013**, *117*, 1-30.
16. Roeske C.A.; Chollet R. Role of metabolites in the reversible light activation of pyruvate, orthophosphate dikinase in *Zea mays* mesophyll cells *in Vivo*. *Plant Physiol.* **1989**, *90*, 330-337.
17. Wang, Y.; Wu, W.H. Plant sensing and signaling in response to K<sup>+</sup>-deficiency. *Mol. Plant.* **2010**, *3*, 280-287.
